# Supplementary material for: Conferring the ability to utilize inorganic polyphosphate on ATP-specific NAD kinase
Source: PubMed Central journal article supplement — Sci Rep. 2013 Sep 11;3:2632. doi: 10.1038/srep02632 (PMC3769651; doi:10.1038/srep02632), 2013-09-11
Supplement: srep02632-s1.pdf [file srep02632-s1.pdf]

## **Supporting information**

### **Conferring the ability to utilize inorganic polyphosphate on ATP-specific NAD kinase**

Yusuke Nakamichi, Aya Yoshioka, Shigeyuki Kawai, Kousaku Murata\*

\*Corresponding author

Kousaku Murata

Address: Laboratory of Basic and Applied Molecular Biotechnology, Division of Food and Biological Science, Graduate School of Agriculture, Kyoto University, Uji, Kyoto 611-0011, Japan

Telephone number: +81-774-38-3766

Fax number: +81-774-38-3767

E-mail: [kmurata@kais.kyoto-u.ac.jp](mailto:kmurata@kais.kyoto-u.ac.jp)

Figures S1, S2, S3 and S4

Table S1

Figure S1

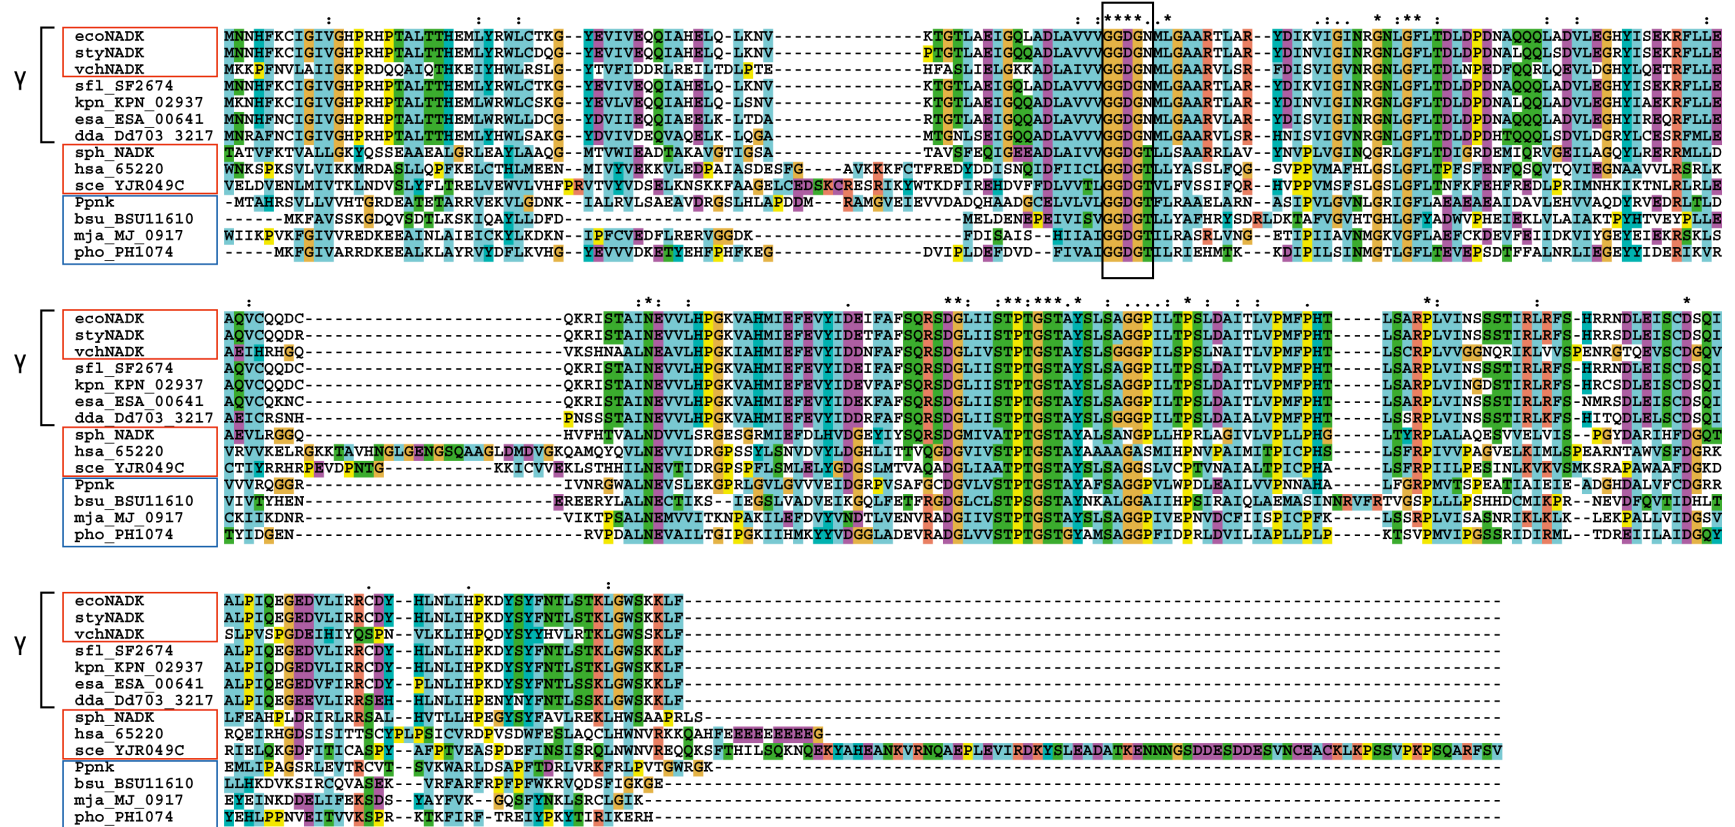

**Figure S1.** Multiple alignment of the primary structures of ATP-specific NADKs (boxed in red), poly(P)/ATP-NADKs (boxed in blue), and  $\gamma$ -proteobacterial NADK homologs (indicated by  $\gamma$ ). ATP-specific NADKs are ecoNADK (*Escherichia coli*), styNADK (*Salmonella enterica*), vchNADK (*Vibrio cholerae*), sph\_NADK (*Sphingomonas* sp. A1), hsa\_65220 (human), and sce\_YJR049C (*Saccharomyces cerevisiae*). Poly(P)/ATP-NADKs are Ppnk (*Mycobacterium tuberculosis*), bsu\_11610 (*Bacillus subtilis*), mja\_MJ\_0917 (*Methanococcus jannaschii*), and pho\_PH1074 (*Pyrococcus horikoshii*).  $\gamma$ -Proteobacterial NADK homologs are ecoNADK, styNADK, vchNADKs, sfl\_SF2674K (*Shigella flexneri*), kpn\_KPN\_02937 (*Klebsiella pneumoniae*), esa\_ESA\_00641 (*Cronobacter sakazakii*), and dda\_Dd703\_3217 (*Dickeya dadantii*).

The motif GGDGN and GGDGT are boxed in black. The motif GGDGN is conserved in the primary structures of some  $\gamma$ -proteobacterial NADK homologs, while the motif GGDGT is found in those of other ATP-specific NADKs and poly(P)/ATP-NADKs. We failed to identify the key conserved residues in all ATP-specific NADKs or all poly(P)/ATP-NADKs; see also Fig. 1.

**Figure S2**

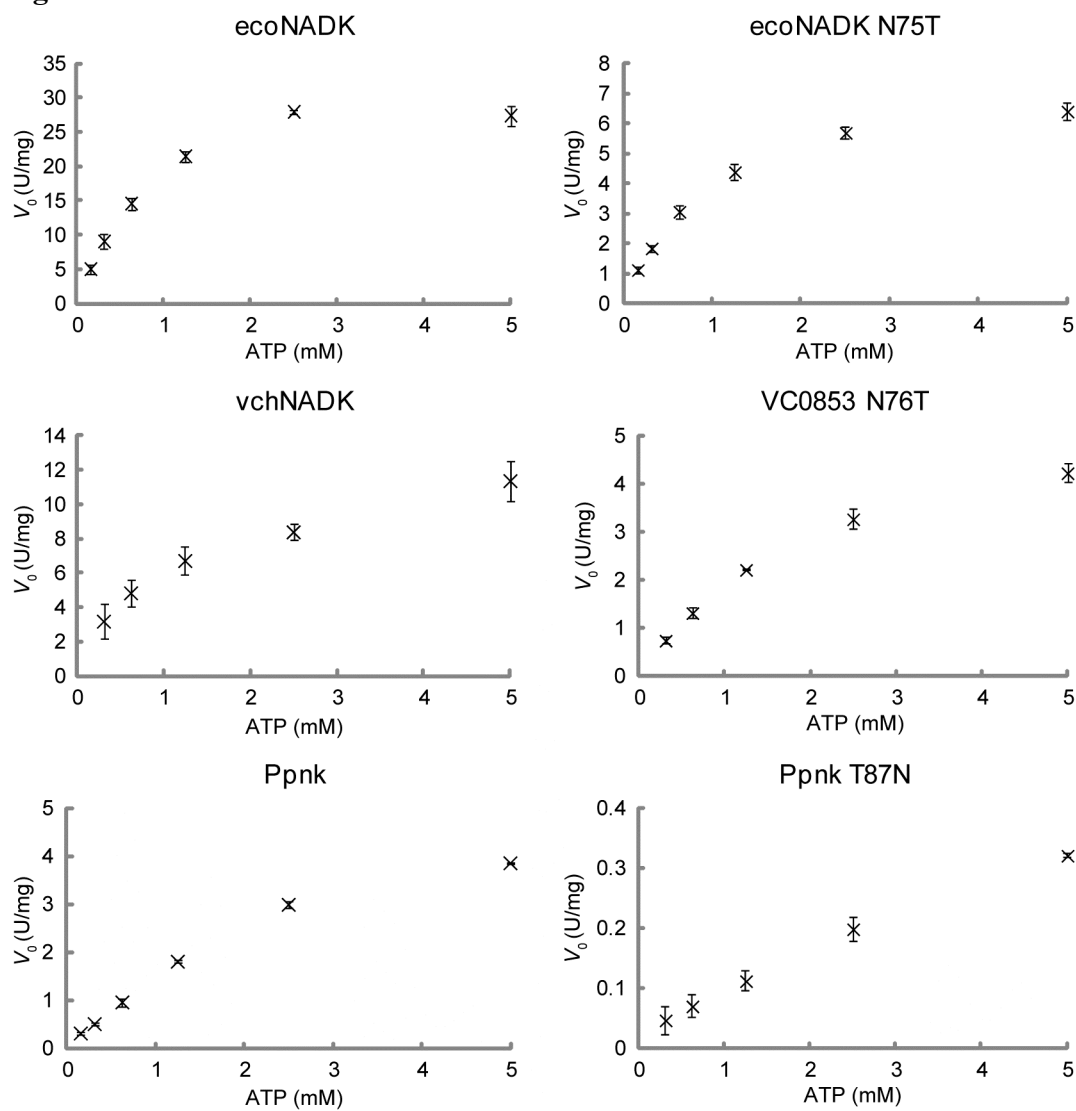

**Figure S2.** The data used to determine  $k_{cat}$  and  $K_m$  of each NADK toward ATP. Means and standard deviations of three independent experiments are shown.

**Figure S3**

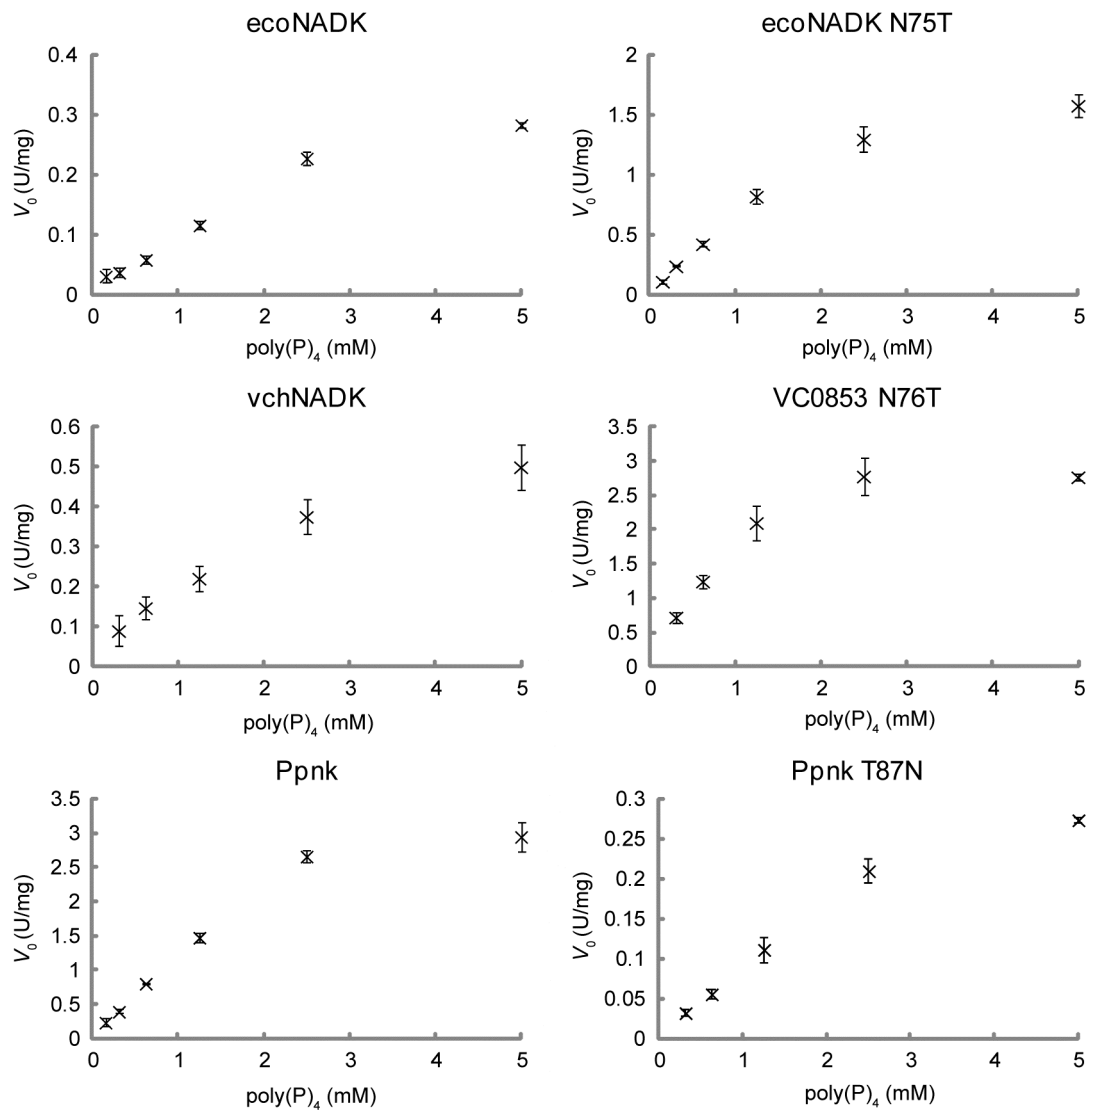

**Figure S3.** The data used to determine  $k_{cat}$  and  $K_m$  of each NADK toward poly( $P$ )<sub>4</sub>. Means and standard deviations of three independent experiments are shown.

Figure S4

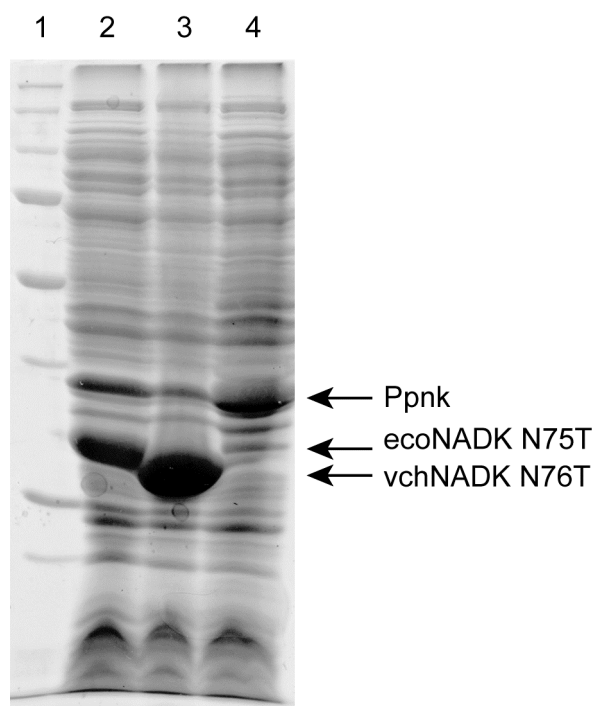

**Figure S4. SDS-PAGE of extracts of cells expressing NADK.** Cells were suspended in 100 mM Tris-HCl (pH 7.5) and ultrasonically disrupted at 9 kHz (Insonator model 201M; Kubota, Osaka, Japan) at 0°C for 10 min, and then centrifuged at 28,000 × *g* for 20 min at 4°C. The resultant clear supernatant was used as a cell extract, which was subjected to SDS-PAGE (12.5% gel). The remaining cells were immobilized and used for mass production of NADP<sup>+</sup>. Lane 1: Protein markers (Bio-Rad, Hercules, CA). Lanes 2–4: cell extracts (50 μg protein) of cells expressing ecoNADK N75T (lane 2), vchNADK N76T (lane 3), and Ppnk (lane 4).

**Table S1. Amino acid residue of  $\gamma$ -proteobacterial NADK corresponding to Asn-75 of *eco*NADK**

| Order                    | Genera                 | N  | T | S | F | Y | H |
|--------------------------|------------------------|----|---|---|---|---|---|
| <i>Enterobacteriales</i> | <i>Cronobacter</i>     | 3  | - | - | - | - | - |
|                          | <i>Dickeya</i>         | 4  | - | - | - | - | - |
|                          | <i>Edwardsiella</i>    | 2  | - | - | - | - | - |
|                          | <i>Enterobacter</i>    | 5  | - | - | - | - | - |
|                          | <i>Erwinia</i>         | 6  | - | - | - | - | - |
|                          | <i>Escherichia</i>     | 55 | - | - | - | - | - |
|                          | <i>Klebsiella</i>      | 7  | - | - | - | - | - |
|                          | <i>Pectobacterium</i>  | 3  | - | - | - | - | - |
|                          | <i>Photorhabdus</i>    | 2  | - | - | - | - | - |
|                          | <i>Pnatoea</i>         | 6  | - | - | - | - | - |
|                          | <i>Proteus</i>         | 1  | - | - | - | - | - |
|                          | <i>Providencia</i>     | 1  | - | - | - | - | - |
|                          | <i>Rahnella</i>        | 3  | - | - | - | - | - |
|                          | <i>Salmonella</i>      | 26 | - | - | - | - | - |
|                          | <i>Serratia</i>        | 5  | - | - | - | - | - |
|                          | <i>Shigella</i>        | 9  | - | - | - | - | - |
|                          | <i>Xenorhabdus</i>     | 2  | - | - | - | - | - |
| <i>Yersinia</i>          | 19                     | -  | - | - | - | - |   |
| <i>Pasteurellales</i>    | <i>Actinobacillus</i>  | 4  | - | - | - | - | - |
|                          | <i>Aggregatibacter</i> | 4  | - | - | - | - | - |
|                          | <i>Buchnera</i>        | 10 | - | - | - | - | - |
|                          | <i>Haemophilus</i>     | 12 | - | - | - | - | - |
|                          | <i>Mannheimia</i>      | 1  | - | - | - | - | - |
|                          | <i>Pasteurella</i>     | 4  | - | - | - | - | - |
|                          | <i>Sodalis</i>         | 1  | - | - | - | - | - |
|                          | <i>Wigglesworthia</i>  | -  | - | 2 | - | - | - |
| <i>Vibrionales</i>       | <i>Aliivibrio</i>      | 3  | - | - | - | - | - |
|                          | <i>Listonella</i>      | 1  | - | - | - | - | - |
|                          | <i>Photobacterium</i>  | 16 | - | - | - | - | - |
|                          | <i>Vibrio</i>          | 20 | - | - | - | - | - |
| <i>Aeromonadales</i>     | <i>Aeromonas</i>       | 3  | - | - | - | - | - |

Table S1. Continued

| Order                    | Genera                   | N  | T  | S  | F | Y | H |
|--------------------------|--------------------------|----|----|----|---|---|---|
| <i>Alteromonadales</i>   | <i>Alteromonas</i>       | -  | -  | 2  | - | - | - |
|                          | <i>Colwellia</i>         | -  | -  | -  | - | 1 | - |
|                          | <i>Glaciecola</i>        | 1  | -  | -  | - | 1 | - |
|                          | <i>Idiomarina</i>        | 1  | -  | -  | - | - | - |
|                          | <i>Mariniobacter</i>     | -  | -  | 3  | - | - | - |
|                          | <i>Oceanimonas</i>       | 1  | -  | -  | - | - | - |
|                          | <i>Pseudoalteromonas</i> | 3  | -  | -  | - | - | - |
|                          | <i>Psychromonas</i>      | -  | -  | -  | - | 1 | - |
|                          | <i>Saccharophagus</i>    | -  | -  | 1  | - | - | - |
|                          | <i>Shewanella</i>        | 24 | -  | -  | - | - | - |
| <i>Oceanospirillales</i> | <i>Alcanivorax</i>       | -  | -  | 1  | - | - | - |
|                          | <i>Chromohalobacter</i>  | -  | -  | 1  | - | - | - |
|                          | <i>Hahella</i>           | -  | -  | 1  | - | - | - |
|                          | <i>Halomonas</i>         | -  | -  | 1  | - | - | - |
|                          | <i>Marinomonas</i>       | -  | -  | 3  | - | - | - |
| <i>Pseudomonadales</i>   | <i>Acinetobacter</i>     | -  | -  | 13 | - | - | - |
|                          | <i>Azotobacter</i>       | -  | -  | 1  | - | - | - |
|                          | <i>Cellvibrio</i>        | -  | -  | 1  | - | - | - |
|                          | <i>Moraxella</i>         | -  | -  | 1  | - | - | - |
|                          | <i>Pseudomonas</i>       | -  | -  | 27 | - | - | - |
|                          | <i>Psychrobacter</i>     | -  | -  | 3  | - | - | - |
| <i>Legionellales</i>     | <i>Coxiella</i>          | -  | -  | 5  | - | - | - |
|                          | <i>Legionella</i>        | -  | -  | 7  | - | - | - |
| <i>Methylococcales</i>   | <i>Alkalilimnicola</i>   | -  | -  | -  | - | 1 | - |
| <i>Chromatiales</i>      | <i>Allochromatium</i>    | -  | -  | -  | - | 1 | - |
|                          | <i>Halorhodospira</i>    | -  | -  | -  | - | 1 | - |
|                          | <i>Halothiobacillus</i>  | -  | -  | -  | - | 1 | - |
|                          | <i>Methylococcus</i>     | -  | -  | -  | - | 1 | - |
|                          | <i>Methylomicrobium</i>  | -  | -  | -  | - | 1 | - |
|                          | <i>Methylomonas</i>      | -  | -  | -  | - | 1 | - |
|                          | <i>Nitrosococcus</i>     | -  | -  | -  | - | 3 | - |
|                          | <i>Thioalkalivibrio</i>  | -  | -  | -  | - | 2 | - |
| <i>Xanthomonadales</i>   | <i>Frateuria</i>         | -  | 1  | -  | - | - | - |
|                          | <i>Pseudoxanthomonas</i> | -  | 2  | -  | - | - | - |
|                          | <i>Stenotrophomonas</i>  | -  | 4  | -  | - | - | - |
|                          | <i>Xanthomonas</i>       | -  | 11 | -  | - | - | - |
|                          | <i>Xylella</i>           | -  | 5  | -  | - | - | - |



Table S1. Continued

| Order                      | Genera                     | N  | T | S | F | Y | H |
|----------------------------|----------------------------|----|---|---|---|---|---|
| <i>Thiotrichales</i>       | <i>Francisella</i>         | 15 | - | - | - | - | - |
|                            | <i>Methylophaga</i>        | -  | - | - | - | 2 | - |
|                            | <i>Thioalkalimicrobium</i> | -  | - | - | - | 1 | - |
|                            | <i>Thiomicrospira</i>      | -  | - | - | - | 1 | - |
| <i>Acidithiobacillales</i> | <i>Acidithiobacillus</i>   | -  | - | - | - | 4 | - |
| <i>Cardiobacteriales</i>   | <i>Dichelobacter</i>       | -  | - | - | - | 1 | - |
| others                     | <i>Baumannia</i>           | 1  | - | - | - | - | - |
|                            | <i>Blochmannia</i>         | 2  | - | - | - | - | - |
|                            | <i>Ferrimonas</i>          | 1  | - | - | - | - | - |
|                            | <i>Gallibacterium</i>      | 1  | - | - | - | - | - |
|                            | <i>Hamiltonella</i>        | 1  | - | - | - | - | - |
|                            | <i>Histophilus</i>         | 2  | - | - | - | - | - |
|                            | <i>Kangiella</i>           | -  | - | 1 | - | - | - |
|                            | <i>Riesia</i>              | -  | - | 1 | - | - | - |
|                            | <i>Ruthia</i>              | -  | - | 1 | - | - | - |
|                            | <i>Teredinibacter</i>      | -  | - | 1 | - | - | - |
|                            | <i>Tolumonas</i>           | -  | - | - | - | - | 1 |
|                            | <i>Unclassified</i>        | -  | - | 1 | - | - | - |
| <i>Vesicomysocius</i>      | -                          | -  | 1 | - | - | - |   |
